# Supplementary material for: Relationship between secondary health conditions and life satisfaction in persons with spinal cord injury: study across twenty-one countries
Source: PubMed Central journal article supplement (PMC10241701; doi:10.1007/s11136-023-03376-3), 2023-03-02
Supplement: 11136_2023_3376_MOESM2_ESM.pdf [file 11136_2023_3376_MOESM2_ESM.pdf]

**International Spinal Cord Injury (InSCI) Community Survey 2018**  
**Ethics committees or review boards approvals in the 22 InSCI countries**

| Country       | Name of ethics committee or institutional board responsible for ethics approval of the InSCI study                                                                                              | Approval number                                     | Approval date                | Form of consent |
|---------------|-------------------------------------------------------------------------------------------------------------------------------------------------------------------------------------------------|-----------------------------------------------------|------------------------------|-----------------|
| Australia     | Northern Sydney Local Health District Human Research Ethics Committee;<br>Australian Institute of Health and Welfare Ethics Committee                                                           | HREC/16/HAWKE/495;<br>EO2017/1/341                  | June 7 2017;<br>Jan 4 2018   | D               |
| Brazil        | Comissão de Ética para Análise de Projetos de Pesquisa do Hospital das Clínicas da Faculdade de Medicina da<br>Universidade de São Paulo, CAPPesq                                               | 97049118.8.0000.0068                                | Nov 8 2018                   | A               |
| China         | Ethics committees of the first affiliated hospital of Nanjing Medical University, Nanjing, Jiangsu Province;<br>Ethics Committee of Sichuan University, Sichuan Province, Chengdu               | No. 2018-SR-004 (Jiangsu)<br>No. K2017053 (Sichuan) | March 7 2018;<br>Jan 22 2018 | B, C            |
| France        | Comité de Protection des Personnes                                                                                                                                                              | Ref : 180304                                        | April 10 2018                | A               |
| Germany       | Ethic Committee of Hannover Medical School                                                                                                                                                      | 7374                                                | Feb 13 2017                  | B               |
| Greece        | Scientific/Ethical Committee of General Hospital 'G. Gennimatas' Athens                                                                                                                         | 20257/1.8.2016                                      | Aug 1 2016                   | A, B            |
| Indonesia     | Health Research Ethics Committee, National Institute of Health Research and Development                                                                                                         | LB.02.01/2/KE.342/2017                              | 15 Nov 2017                  | A               |
| Italy         | Comitato Etico Interaziendale AOU 'Maggiore della Carità' di Novara, ASL BI, ASL NO, ASL VCO                                                                                                    | ItaSCI, 1, 25-01-2018                               | April 27 2018                | A               |
| Japan         | Research Ethics Committee of Wakayama Medical University                                                                                                                                        | 2079                                                | July 12 2017                 | A               |
| Lithuania     | Vilnius Regional Committee for the Ethics of Biomedical Research                                                                                                                                | 158200-17-907-421                                   | Mai 9 2017                   | A, B            |
| Malaysia      | Medical Research and Ethics Committee, Ministry of Health                                                                                                                                       | NMRR-16-2747-28885(IIR)                             | July 14 2017                 | A               |
| Morocco       | Hospital and University Ethics Committee of Fez                                                                                                                                                 | 03/17                                               | July 20 2017                 | A               |
| Netherlands   | Medical Ethics Board University Medical Center Utrecht                                                                                                                                          | WAG/mb/17/024763                                    | Aug 16 2017                  | A               |
| Norway        | Regional Committee for Medical and Health Research Ethics, South East                                                                                                                           | 2016/1184/REK sør-øst                               | Sept 21 2016                 | A, B            |
| Poland        | Bioethical Committee of the Medical University of Lodz                                                                                                                                          | RNN/198/16/KE                                       | July 12 2016                 | A, B            |
| Romania       | Ethical Committee of Rehabilitation Hospital Felix Spa                                                                                                                                          | 2228/06.03.2017                                     | March 3 2017                 | A, B            |
| South Korea   | Institutional Review Board of National Rehabilitation Center                                                                                                                                    | NRC-2016-05-039                                     | Nov 9 2016                   | A, B            |
| South Africa  | Biomedical Science Research Ethics Committee of the University of the Western Cape                                                                                                              | BM/16/3/24                                          | Oct 24 2016                  | A, C (recorded) |
| Spain         | Ethical Committee of Hospital Universitari Vall d'Hebron, Hospital Universitario de Cruces, Hospital<br>Universitario Materno Infantil de Gran Canaria, Hospital Universitario Virgen del Rocío | PR(ATR)285/2016                                     | Oct 2016                     | A               |
| Switzerland   | Ethical Committee of Northern and Central Switzerland                                                                                                                                           | 11042 PB_2016-02608                                 | Dec 21 2016                  | A, B            |
| Thailand      | Ethical Committee of Faculty Medicine, Chiang Mai University                                                                                                                                    | REH-2559-04167                                      | Dec 9 2016                   | A               |
| United States | University of Vermont Institutional Review Board                                                                                                                                                | CHRBSS:16-574                                       | Nov 21 2017                  | A, E            |

Note: A=written consent; B=questionnaire completion considered as implicit consent; C=oral consent; D=waiver of consent; E=electronic consent
